# Supplementary material for: Examination of Prognostic Factors Affecting Long-Term Survival of Patients with Stage 3/4 Gallbladder Cancer without Distant Metastasis
Source: MDPI journal article supplement (doi:10.3390/cancers12082073), 2020-07-27
Supplement: s1 [file s1]

# Examination of Prognostic Factors Affecting Long-Term Survival of Patients with Stage 3/4 Gallbladder Cancer without Distant Metastasis

Ryota Higuchi, Takehisa Yazawa, Shuichirou Uemura, Yutaro Matsunaga, Takehiro Ota, Tatsuo Araida, Toru Furukawa and Masakazu Yamamoto

**Table S1.** (A) Number at risk, median survival time, and 5-year survival rate based on degree of liver invasion. (B) Number at risk, median survival time, and 5-year survival rate based on degree of hepatoduodenal ligament invasion.

| (A)                                                           |                |      |      |                               |                             |
|---------------------------------------------------------------|----------------|------|------|-------------------------------|-----------------------------|
| Liver Invasion                                                | Number at Risk |      |      | Median Survival Time (Months) | 5-Year Overall Survival (%) |
|                                                               | 0 M            | 24 M | 60 M |                               |                             |
| Hinf0; no invasion                                            | 76             | 52   | 33   | 56                            | 48                          |
| Hinf1; Direct invasion of the liver parenchyma, <5 mm         | 27             | 9    | 5    | 28                            | 40                          |
| Hinf2; Direct invasion of the liver parenchyma, ≥5 mm, <20 mm | 26             | 11   | 4    | 16                            | 23                          |
| Hinf3; Direct invasion to the liver parenchyma, ≥20 mm        | 28             | 7    | 3    | 18                            | 14                          |

  

| (B)                                                                                               |                |      |      |                               |                             |
|---------------------------------------------------------------------------------------------------|----------------|------|------|-------------------------------|-----------------------------|
| Hepatoduodenal Ligament Invasion                                                                  | Number at Risk |      |      | Median Survival Time (Months) | 5-Year Overall Survival (%) |
|                                                                                                   | 0 M            | 24 M | 60 M |                               |                             |
| Binf0; no invasion                                                                                | 80             | 52   | 33   | 56                            | 49                          |
| Binf1; Invasion of the right margin of the hepatoduodenal ligament, but not of the left margin    | 24             | 9    | 5    | 20                            | 41                          |
| Binf2; Invasion of the left margin of the hepatoduodenal ligament, but not of the entire ligament | 37             | 11   | 4    | 17                            | 16                          |
| Binf3; Invasion through the hepatoduodenal ligaments                                              | 16             | 7    | 3    | 16                            | 19                          |

**Table S2.** (A) Number at risk, median survival time, and 5-year survival rate based on the number of prognostic factors predicted preoperatively in patients with stage 3/4 gallbladder cancer without distant metastases. (B) Number at risk, median survival time to recurrence, and 5-year recurrence-free survival rate based on the number of prognostic factors predicted preoperatively in patients with stage 3/4 gallbladder cancer without distant metastases.

| (A)                   |                |      |      |                              |                                  |
|-----------------------|----------------|------|------|------------------------------|----------------------------------|
| Number of Risk Factor | Number at Risk |      |      | Median Survival Time (month) | 5-Year Overall Survival Rate (%) |
|                       | 0 M            | 24 M | 60 M |                              |                                  |
| Zero factors          | 68             | 45   | 31   | NA                           | 54.2                             |
| One factor            | 54             | 28   | 13   | 31                           | 34.2                             |
| Two factors           | 27             | 5    | 1    | 15                           | 5.87                             |
| Three factors         | 8              | 1    | 0    | 8.5                          | 0                                |

  

| (B)                   |                |      |      |                |                |
|-----------------------|----------------|------|------|----------------|----------------|
| Number of Risk Factor | Number at Risk |      |      | Number at Risk | Number at Risk |
|                       | 0 M            | 24 M | 60 M |                |                |
| Zero factors          | 68             | 42   | 27   | 46             | 47.4           |
| One factor            | 54             | 24   | 11   | 22             | 23.6           |
| Two factors           | 27             | 3    | 1    | 9              | 10.0           |
| Three factors         | 8              | 0    | 0    | 7              | 0              |

**Table S3.** Characteristics of cases.

| Total                                                  | n = 157         |
|--------------------------------------------------------|-----------------|
| Period 1985–1999/2000–2017                             | 41% / 59%       |
| Age, median (minimum–maximum)                          | 69 (31–88)      |
| Female                                                 | 55%             |
| Incidental gallbladder cancer                          | 10%             |
| Cholecystectomy/Liver bed resection/S4a5/≥2 sections   | 23%/21%/27%/29% |
| With/without bile duct resection/pancreatoduodenectomy | 50%/25%/24%     |

|                                                      |                                                |                                           |
|------------------------------------------------------|------------------------------------------------|-------------------------------------------|
| Vascular reconstruction (portal vein/hepatic artery) |                                                | 16% (15%/1%)                              |
| Blood loss, median (minimum-maximum)                 |                                                | 1000 (5–9200)                             |
| Surgery time, median (minimum-maximum)               |                                                | 345 (90–740)                              |
| R0 resection                                         |                                                | 80%                                       |
| AJCC stage (IIIA/IIIB/IVA/IVB)                       |                                                | 33 (21%) /68 (43%) /31(20%) /25 (16%)     |
| Morbidity (Clavien-Dindo classification ≥3)          |                                                | 41%                                       |
| Surgical mortality                                   |                                                | 4.5% (7/157, details of each case follow) |
| 1987                                                 | Right hepatectomy with BDR                     | Biliary fistula, liver failure            |
| 1988                                                 | Right HLPD, HA, PV                             | Bleeding, liver failure                   |
| 1990                                                 | Right HLPD, HA, PV                             | Liver stump abscess, liver failure        |
| 2001                                                 | Right hepatectomy with BDR                     | Liver stump abscess, liver failure        |
| 2005                                                 | Right trisectionectomy, BDR, PV                | Liver stump abscess, liver failure        |
| 2006                                                 | Right hepatectomy with BDR                     | Liver stump abscess, liver failure        |
| 2015                                                 | Liver bed resection with lymph node dissection | Lymph fistula, liver cirrhosis            |

AJCC, American Joint Committee Classification ; BDR, bile duct resection; HLPD, hepato-ligament-pancreaticoduodenectomy; HA, hepatic artery resection; PV, portal vein resection.

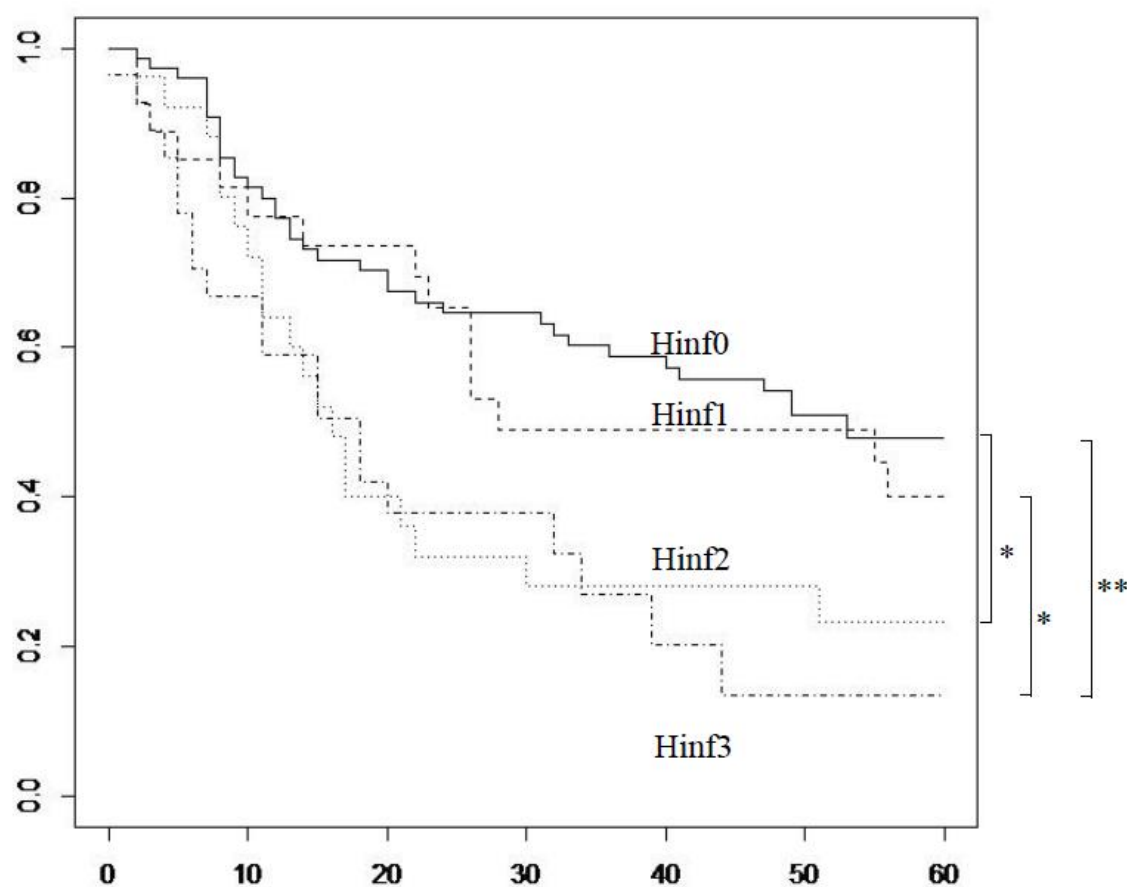

(A)

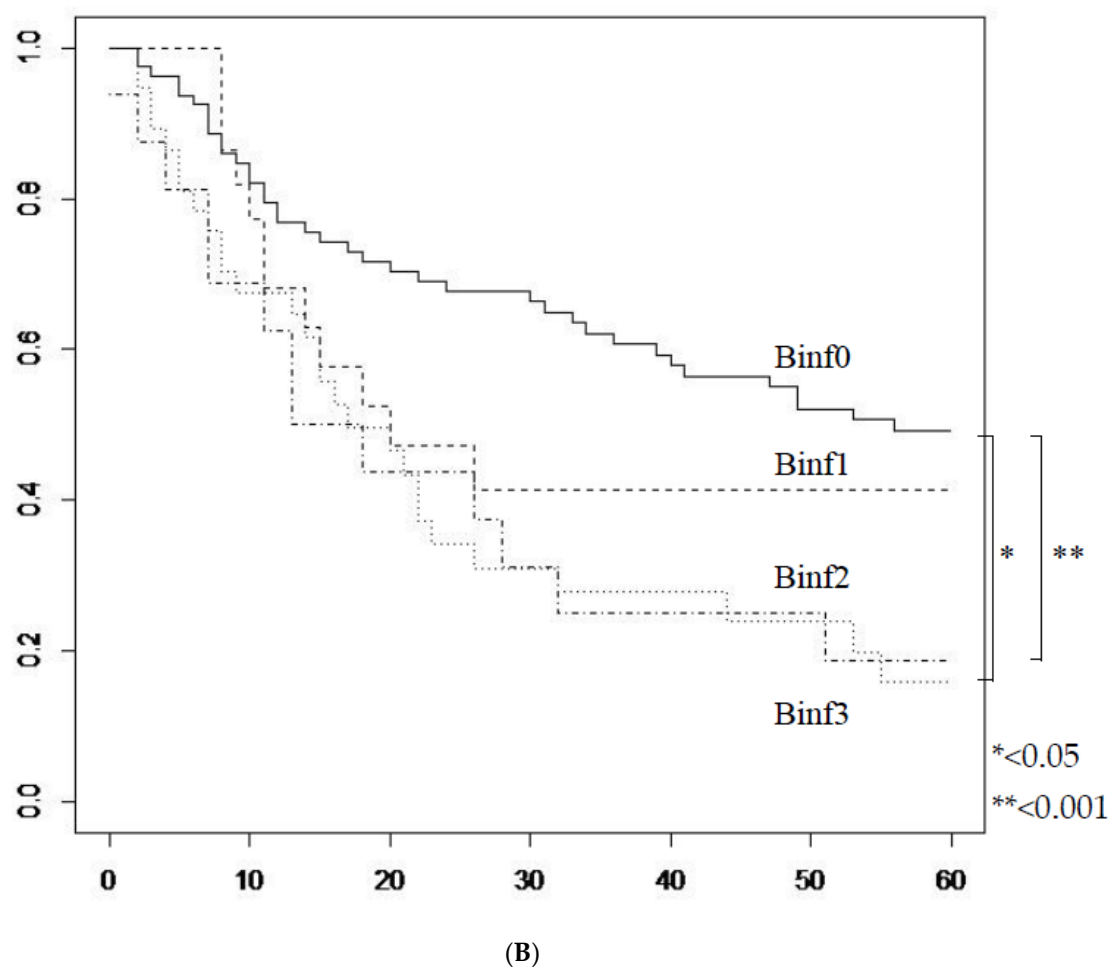

**Figure S1.** (A) Overall survival rate based on degree of liver invasion. Hinf0, no invasion; Hinf1, Direct invasion of the liver parenchyma, <5 mm; Hinf2, Direct invasion of the liver parenchyma,  $\geq 5$  mm, <20 mm; Hinf3, Direct invasion to the liver parenchyma,  $\geq 20$  mm. \* $< 0.05$ , \*\* $< 0.01$ . (B). Overall survival rate based on degree of hepatoduodenal ligament invasion. Binf0, no invasion; Binf1, Invasion of the right margin of the hepatoduodenal ligament, but not of the left margin; Binf2, Invasion of the left margin of the hepatoduodenal ligament, but not of the entire ligament; Binf3, Invasion through the hepatoduodenal ligaments.

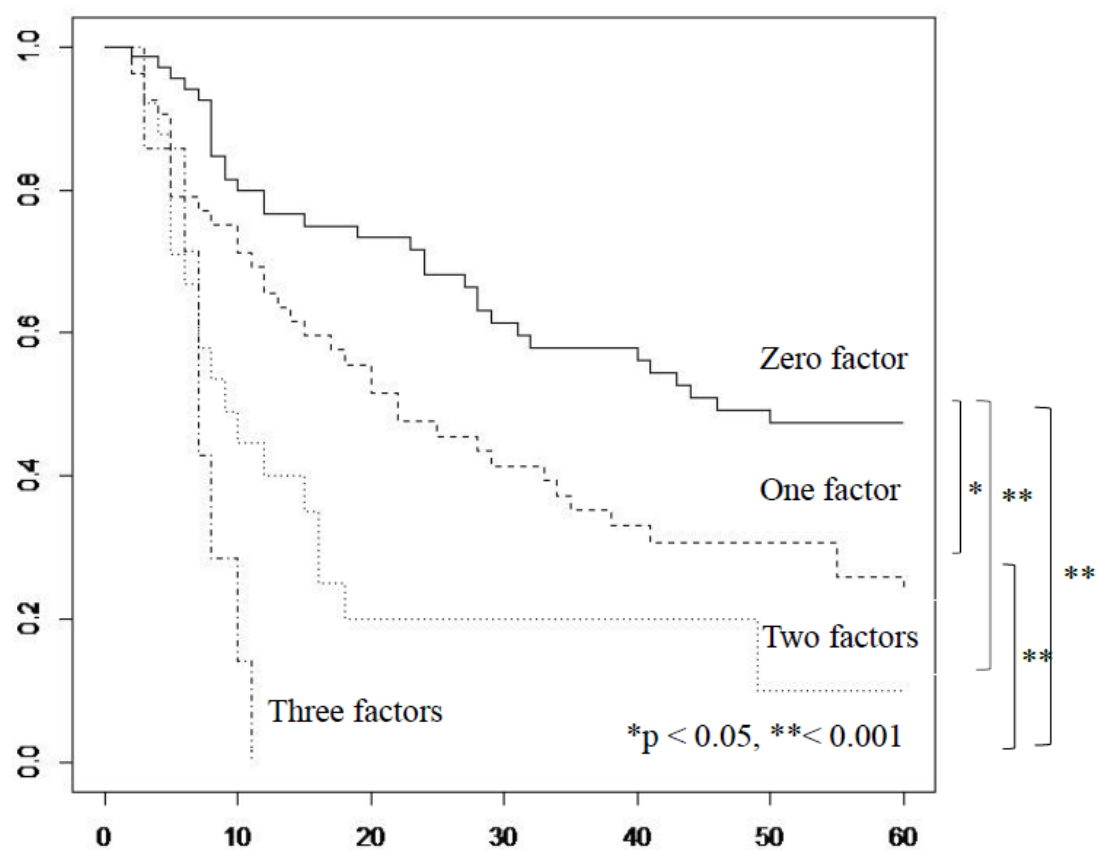

**Figure S2.** Recurrence-free survival (RFS) rate depending on the number of prognostic factors in patients with stage 3/4 gallbladder cancer without distant metastasis.

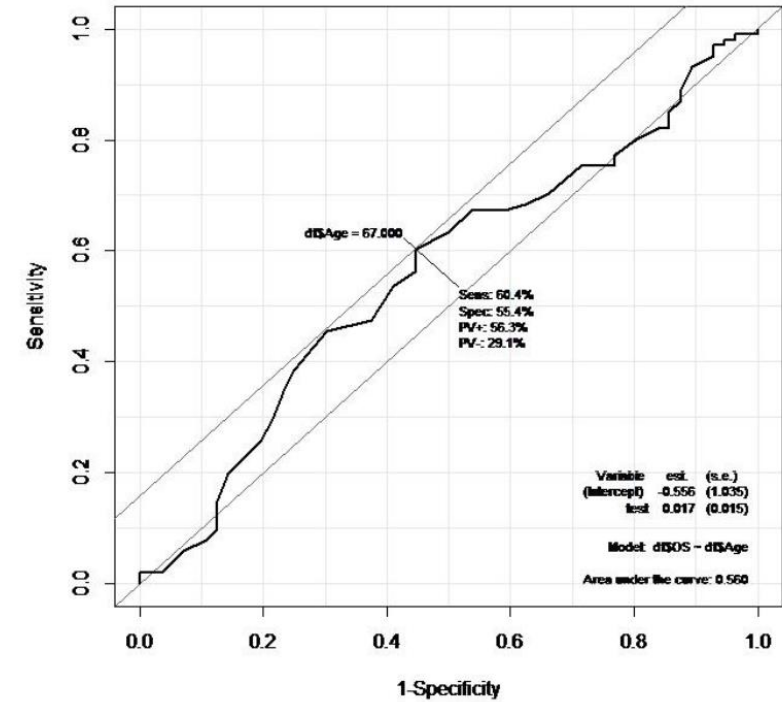

(A)

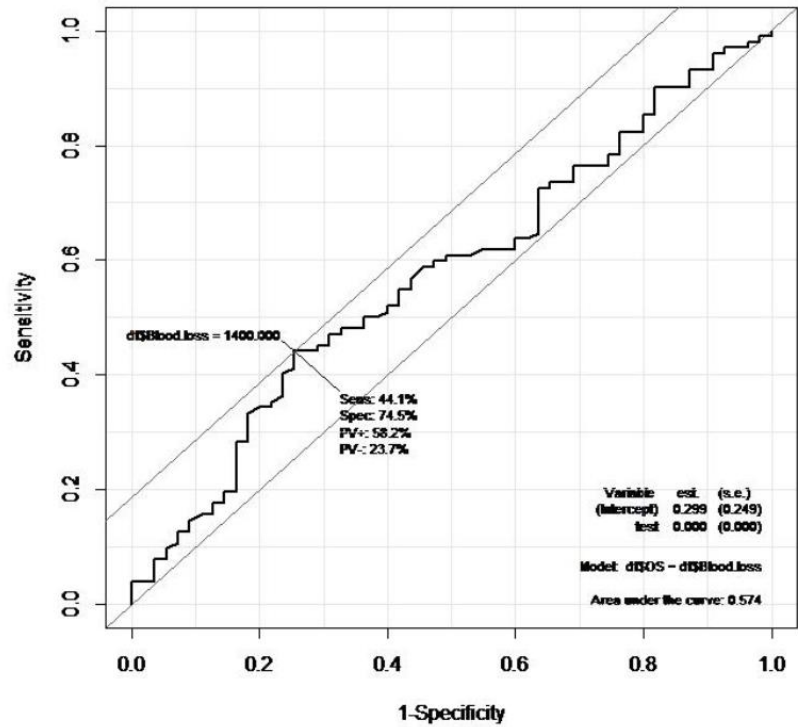

(B)

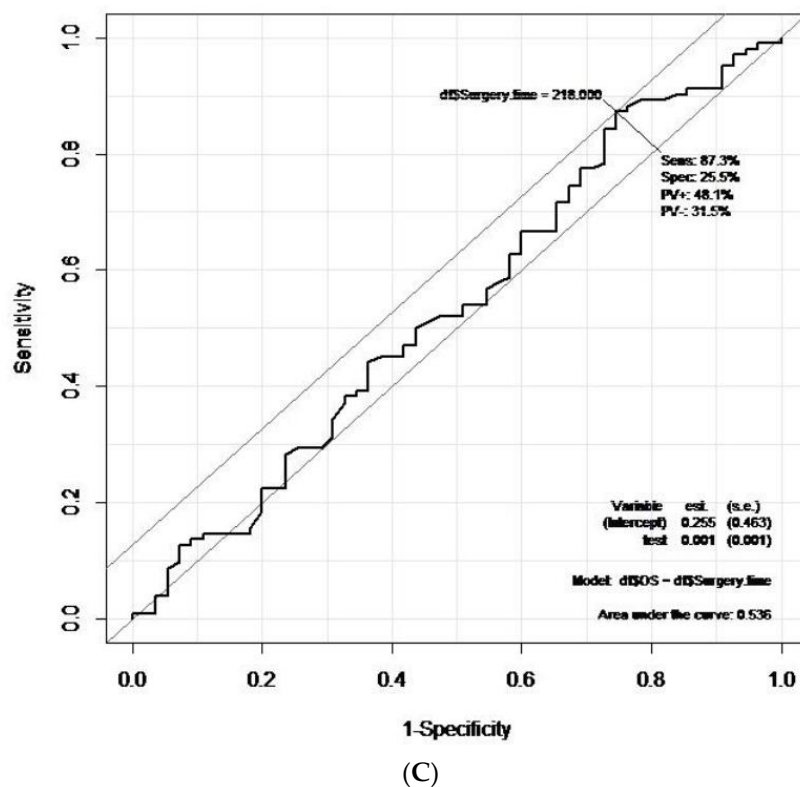

**Figure S3.** (A)The receiver operating characteristic analysis of age with death used as an event. PV-: negative predictive value; PV+: positive predictive value; Sens: sensitivity; Spec: specificity. (B)The receiver operating characteristic analysis of blood loss with death used as an event. PV-: negative predictive value; PV+: positive predictive value; Sens: sensitivity; Spec: specificity. (C)The receiver operating characteristic analysis of surgery time with death used as an event. PV-: negative predictive value; PV+: positive predictive value; Sens: sensitivity; Spec: specificity.

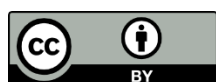

© 2020 by the authors. Licensee MDPI, Basel, Switzerland. This article is an open access article distributed under the terms and conditions of the Creative Commons Attribution (CC BY) license (<http://creativecommons.org/licenses/by/4.0/>).
